# Supplementary material
Source: PubMed Central journal article supplement (PMC4325145)
Supplement: AEM.03019-14_zam999116064so1.pdf [file AEM.03019-14_zam999116064so1.pdf]

**A Novel CO-Responsive Transcriptional Regulator and Enhanced H<sub>2</sub>  
Production by an Engineered *Thermococcus onnurineus* NA1**

Min-Sik Kim,<sup>a</sup> Ae Ran Choi,<sup>a</sup> Seong Hyuk Lee,<sup>a,b</sup> Hae-Chang Jung,<sup>a,b</sup> Seung Seob Bae,<sup>a,b</sup>  
Tae-Jun Yang,<sup>a</sup> Jeong Ho Jeon,<sup>a</sup> Jae Kyu Lim,<sup>a</sup> Hwan Youn,<sup>c</sup> Tae Wan Kim,<sup>a,b</sup> Hyun Sook  
Lee,<sup>a,b</sup> Sung Gyun Kang<sup>a,b</sup>

Korea Institute of Ocean Science and Technology, Ansan, South Korea,<sup>a</sup> and Department of  
Marine Biotechnology, University of Science and Technology, Daejeon, South Korea<sup>b</sup>

Department of Biology, California State University, Fresno, California, USA<sup>c</sup>

Address correspondence to Hyun Sook Lee, [leeh522@kiost.ac](mailto:leeh522@kiost.ac), or Sung Gyun Kang  
[sgkang@kiost.ac](mailto:sgkang@kiost.ac).

M.S.K, A.R.C. and S.H.L. contributed equally to this article.

Running title: A novel CO-dependent transcriptional regulator

## Supplemental Material

**Table S1** Primers used in this study

| Primer                                     | Oligonucleotide sequences                           |                                                      |
|--------------------------------------------|-----------------------------------------------------|------------------------------------------------------|
| <b>RT-qPCR</b>                             |                                                     |                                                      |
| TON_1018                                   | 5'-gttcgagaatcctgctggtctt-3'                        | 5'-agcaactggcaagtctgaaatg-3'                         |
| <i>corR</i> (TON_1016)                     | 5'-agatgggttcagattcgatgaag-3'                       | 5'-tgcccctcagctcatcgtagataa-3'                       |
| <b>Construction of mutant</b>              |                                                     |                                                      |
| TON_1016- inverse PCR                      | 5'-catccccagggagcattact-3'                          | 5'-aaaaggaataactgtactca-3'                           |
| TON_1016- LA and RA                        | 5'-caggacactcgaagaggtagtcag-3'                      | 5'-gttccttgctactattgtatctgca-3'                      |
| TON_1015-1-LA                              | 5'-gccagtgccaaagcttgcagcaagttgagagggcttttcttaac-3'  | 5'-tacgaattcgagctcggtagcaagccagacctgaagagctttac-3'   |
| TON_1015-1-RA                              | 5'-aagccctctcaacttgcagcatagaagagctagtaggcagaaaca-3' | 5'-gccagtgccaaagcttgcagctgatggagaaactcccataatctta-3' |
| <b>Construction of pQRc</b>                |                                                     |                                                      |
| pQRc-LA                                    | 5'-gggagatgactgcaggcatgcgtggc-3'                    | 5'-gccagtgccaaagcttgcagcaatgg-3'                     |
| pQRc-RA                                    | 5'-ttacgaattggatccggtacccagac-3'                    | 5'-ctcactctcgttcaggtaccttatec-3'                     |
| pQRc-inverse PCR                           | 5'-tcatctcccaagcattttat-3'                          | 5'-ctgcaggcatgcgtggcgtc-3'                           |
| <i>corQR</i> -insert                       | 5'-tgtatgcatactttcataggtgt-3'                       | 5'-gattttaagatggaatcgtgttcgg-3'                      |
| <b>Confirmation of mutant construction</b> |                                                     |                                                      |
| TON_1015-1-confirm                         | 5'-cactttcatagcagaataaa-3'                          | 5'-ctcgtatggcctgaactct-3'                            |
| TON_1016-confirm                           | 5'-aagactttagaaaagtggag-3'                          | 5'-ttgttggcgtaaggacaac-3'                            |

HMG-confirm

5'-atgaacgtaaaagtccttg-3'

5'-tccttaggtagttacttc-3'

---

**TABLE S2** Kinetic parameters of wild-type,  $\Delta\text{CorQ}/\text{corQR}^\uparrow$ , and  $\Delta\text{CorR}/\text{corQR}^\uparrow$  strains.

| Kinetic parameter <sup>a</sup>                                                    | Wild-type | $\Delta\text{CorQ}/\text{corQR}^\uparrow^a$ | $\Delta\text{CorR}/\text{corQR}^\uparrow^a$ |
|-----------------------------------------------------------------------------------|-----------|---------------------------------------------|---------------------------------------------|
| $\mu_{\text{max}}$ ( $\text{h}^{-1}$ )                                            | 0.4       | 0.3                                         | 1.4                                         |
| $r_{\text{max}}$ ( $\text{mmol liter}^{-1} \text{h}^{-1}$ )                       | 33.0      | 46.0                                        | 191.9                                       |
| Biomass productivity ( $\text{g liter}^{-1} \text{h}^{-1}$ ) <sup>b</sup>         | 0.06      | 0.08                                        | 0.29                                        |
| $q_{\text{max}}$ ( $\text{mmol g}^{-1} \text{h}^{-1}$ )                           | 151.3     | 92.4                                        | 249.6                                       |
| $\text{H}_2$ productivity ( $\text{mmol liter}^{-1} \text{h}^{-1}$ ) <sup>b</sup> | 33.1      | 41.8                                        | 168.4                                       |
| $Y_{\text{p/x}}$ ( $\text{g H}_2 \text{g}^{-1} \text{biomass}$ )                  | 0.4       | 0.7                                         | 1.2                                         |

<sup>a</sup> Kinetic parameters were calculated with data from graphs in Fig. 4.  $\mu_{\text{max}}$ , maximum specific growth rate;  $r_{\text{max}}$ , maximum  $\text{H}_2$  production rate;  $q_{\text{max}}$ , maximum specific  $\text{H}_2$  production rate;  $Y_{\text{p/x}}$ , product yield coefficient with respect to biomass.

<sup>b</sup> Productivity was determined by dividing total yield by time difference from 8 to 11 h for the wild-type strain and from 6.5 to 9.5 h for  $\Delta\text{CorQ}/\text{corQR}^\uparrow$  and from 4.5 to 11 h for  $\Delta\text{CorR}/\text{corQR}^\uparrow$ .

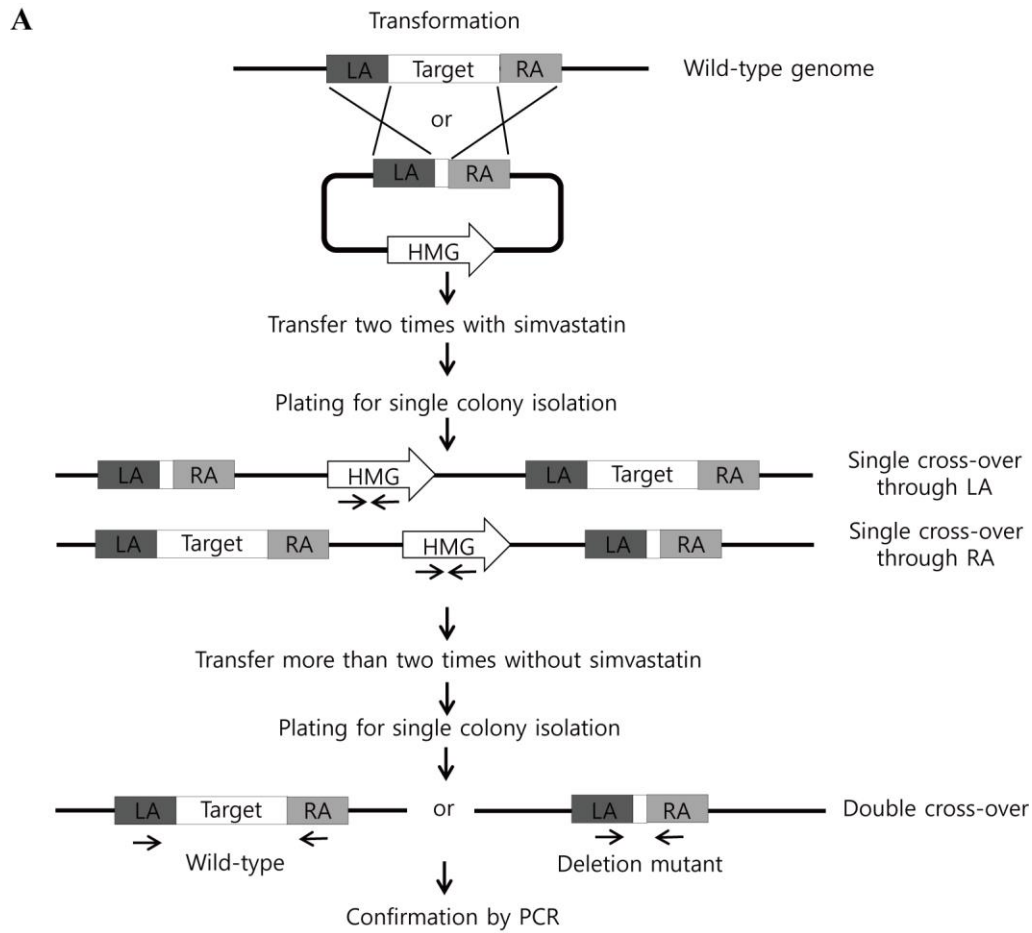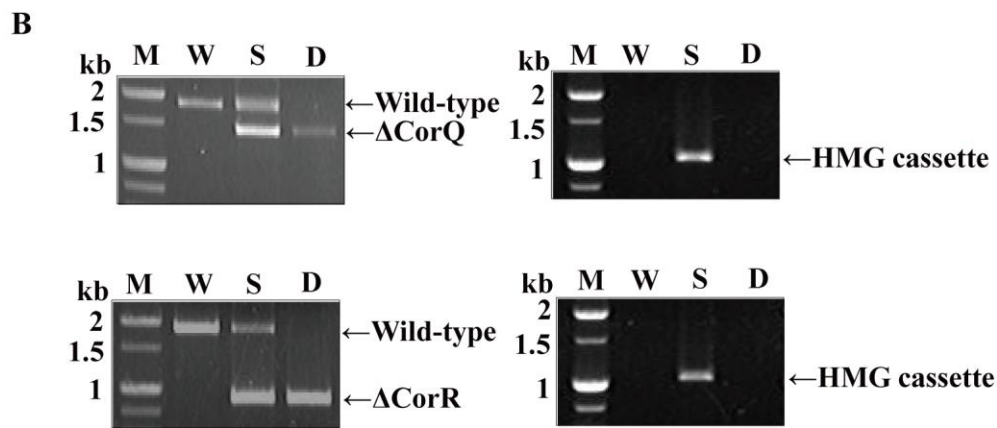

1

2

3 **FIG S1** Gene disruption. (A) Schematic diagram showing the strategy for in-frame deletions  
 4 of *corR* and *corQ* genes. Cells were transformed with the vector containing a deleted target

5 gene flanked by two ~1 kb DNA fragments suitable for homologous recombination (LA, left  
6 arm; RA, right arm). After two-times plating with 10  $\mu$ M simvastatin, single colonies, where  
7 single cross-over occurred, were selected and confirmed by PCR. After two-times more  
8 plating without simvastatin, cells having mutated target gene were selected. Locations of  
9 primers used for confirmation were marked by black arrows under corresponding genes. (B)  
10 PCR confirmation of  $\Delta$ CorQ (two upper pannels) and  $\Delta$ CorQ (two lower pannels) mutants.  
11 DNA bands specific for wild-type,  $\Delta$ CorQ,  $\Delta$ CorR, and HMG cassette were indicated by  
12 arrows at the right sides of figures. M, DNA size marker; W, genomic DNA of the wild-type  
13 strain; S, genomic DNA of cells harboring the integrated vector; D, genomic DNA of the  
14 mutants.

15

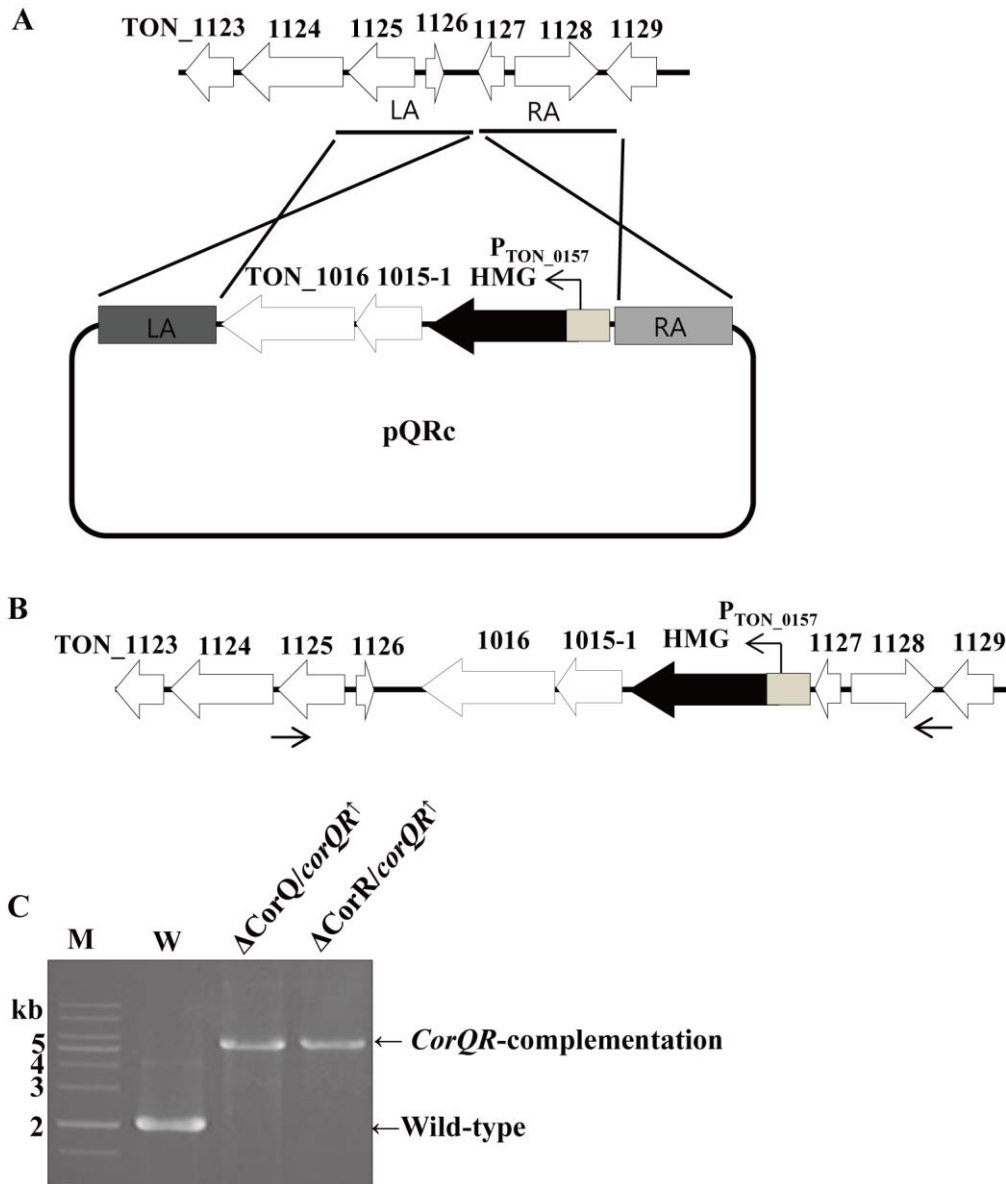

18 **FIG S2** Construction of  $\Delta\text{CorQ}/\text{corQR}^\dagger$  and  $\Delta\text{CorR}/\text{corQR}^\dagger$  strains. (A) Schematic diagram  
 19 showing the strategy for integrating *corQR* genes into the intergenic region between  
 20 TON\_1126 and TON\_1127. pQRc vector was constructed to contain *corQR* and  
 21  $P_{\text{TON}_0157}\text{HMG}_{\text{pfu}}$  cassette genes flanked by 1 kb DNA regions for homologous recombination  
 22 which were designated as LA (left arm) and RA (right arm). (B) A schematic diagram

23 showing the genome context of *corQR*-complemented strains after double cross-over. The  
24 positions of primer used for confirmation of mutant construction were indicated by arrows.  
25 (C) PCR confirmation of *corQR* integration. DNA bands corresponding to wild-type and  
26 integrated sequences were indicated by arrows. M, DNA size marker; W, genomic DNA of  
27 the wild-type strain;  $\Delta\text{CorQ}/\text{corQR}^\uparrow$ ,  $\Delta\text{CorQ}$  mutant containing integrated *corQR* sequence;  
28  $\Delta\text{CorR}/\text{corQR}^\uparrow$ ,  $\Delta\text{CorR}$  mutant containing integrated *corQR* sequence.

29



**A**

|             |     |                                                            |     |     |
|-------------|-----|------------------------------------------------------------|-----|-----|
| TERMP_01155 | 262 | LELLELISQVNSFRAACKALGVSPSTYWEKIRSLLEKLGISLIISVRGGRKKGITILT | EFA | 319 |
| TES1_1213   | 262 | LELLELISQVNSFRAACKALGVSPSTYWERTKNLEEKLGVALISVRGGRKKGITILT  | DFA | 319 |
| TAM4_1057   | 295 | MELLELISQLKSFRAACKAIGVSPSTYWERTKELEYKLGMSLITVRGGRKKGITVLT  | GFA | 355 |
| TON_1016    | 285 | MELLELISQTRSFRAACKIMGVSPSTYWERTRDIEEKGRRLIVSVKGGRRKKGITVLT | GVA | 345 |
| Kcr_0760    | 284 | LELLSLTEELGSLQAARTIGATPSSIFKRIRRMGGVLGRITSSRGGYLRGGVRLT    | PEC | 344 |
|             |     |                                                            |     |     |
| TERMP_01155 | 320 | KDLLKEYREIREKAI----VSLYEY---                               |     | 340 |
| TES1_1213   | 320 | KELLREYKHIREKVL----VSLYEYK--                               |     | 341 |
| TAM4_1057   | 356 | RDILEEYRRVREKVL----LSLYT----                               |     | 375 |
| TON_1016    | 346 | LDLLKEYQRIRERVL----LSLNERF--                               |     | 367 |
| Kcr_0760    | 345 | EGLVRRYRELKVSIIINRYRLSMEKLDG                               |     | 372 |

**B**

|             |     |                                                                    |     |
|-------------|-----|--------------------------------------------------------------------|-----|
| TERMP_01156 | 122 | MKVNIYECISCYRAPPIGRTLCDFEAGLIQGVMEELVGKNVT--REIYCWGLGNSFCGFEV      | 183 |
| TES1_1214   | 58  | MKVNIYECMSCYKAPLIGRTLCDFEAGLIQGVMEKLGKNIT--RELYCWGLGNSFCGFEV       | 119 |
| TON_1015-1  | 63  | IKLNIYECMSCYHTVPIGRTLCDFEAGLIQGIIEELVGRNIT--REIYCQGLGYSFCGFEV      | 124 |
| TAM4_1099   | 58  | MKVNLIEYCISCYNIKPVGRTLCDFEAGFIQGVMEALIGKNIT--REIYCWGLGNHFCGFEV     | 119 |
| Kcr_0759    | 117 | IRITVKDSFEARGRR-ADAPVCHFVAGILSAIVE*DVFSIRTGPLVE*ESCAAT*GND*FCT*ESA | 186 |

30

31 **FIG S3** Multiple sequence alignments of the helix-turn-helix (HTH) motifs of CorR proteins  
32 (A) and the V4R domains of CorQ proteins (B). Shown from top to bottom (GeneBank  
33 accession numbers in parentheses) are: TERMP\_01155 (ADT84131) from *T. barophilus* MP,  
34 TES1\_1213 (AHF80595) from *Thermococcus* sp. ES1, TAM4\_1057 (EEB72950) from  
35 *Thermococcus* sp. AM4, TON\_1016 (ACJ16504) from *T. onnurineus* NA1, Kcr\_0760  
36 (ACB07508) from *Ca. K. cryptofilum* OPF8, TERMP\_01156 (ADT84132) from *T.*  
37 *barophilus* MP, TES1\_1214 (AHF80596) from *Thermococcus* sp. ES1, TON\_1015-1-  
38 (KM489057) from *T. onnurineus* NA1, TAM4\_1099 (EEB72992) from *Thermococcus* sp.  
39 AM4, Kcr\_0759 (ACB07507) from *Ca. K. cryptofilum* OPF8. The conserved residues are  
40 shown with black backgrounds (white letters) and three conserved cysteine residues are  
41 indicated by asterisks.
